# Supplementary material for: Estrogen receptor alpha regulates the expression of adipogenic genes genetically and epigenetically in rat bone marrow-derived mesenchymal stem cells
Source: PeerJ journal article supplement (doi:10.7717/peerj.12071), 2021-09-10

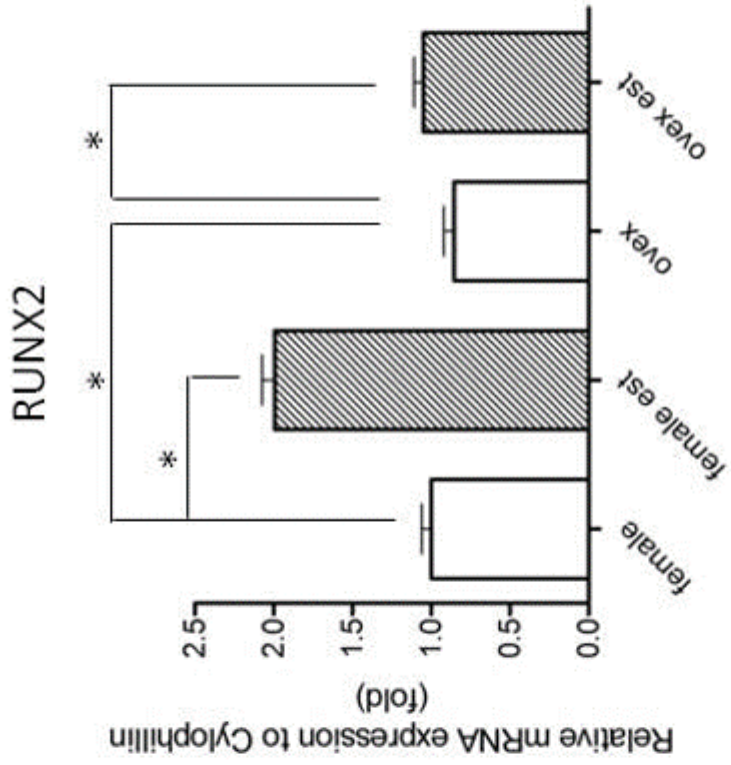

Supplement: Supplemental_Figure_1.pdf [file Supplemental_Figure_1.pdf]
